# Supplementary material
Source: publisher figshare collection journal article supplement (https://aacr.figshare.com/ndownloader/files/39924635)
Supplement: Supplementary file 1 [file 39924635]

SUPPLEMENTARY INFORMATION

**Supplementary Figure S1. Pharmacodynamic analyses of LINE1 and specific gene demethylation.** A: Change in CpG site methylation of LINE-1 in PBMCs from subjects in the G+C arm (n= 49). B: Average change in CpG site methylation of LINE-1 in PBMCs from subjects in the G+C arm with at least two treatment cycles and best clinical response (n= 15). Patients with or without increased LINE-1 demethylation after cycle 1 of G+C treatment are shown on the left and right, respectively. C: Gene-specific demethylation in paired tumor biopsies from subjects in the G+C arm (n=8). BRCA1 was measured, but is not shown due to extremely low signal and no significant changes observed. Error bars represent standard error of the mean. n=number of cycles for each subject; PR=partial response; SD=stable disease.


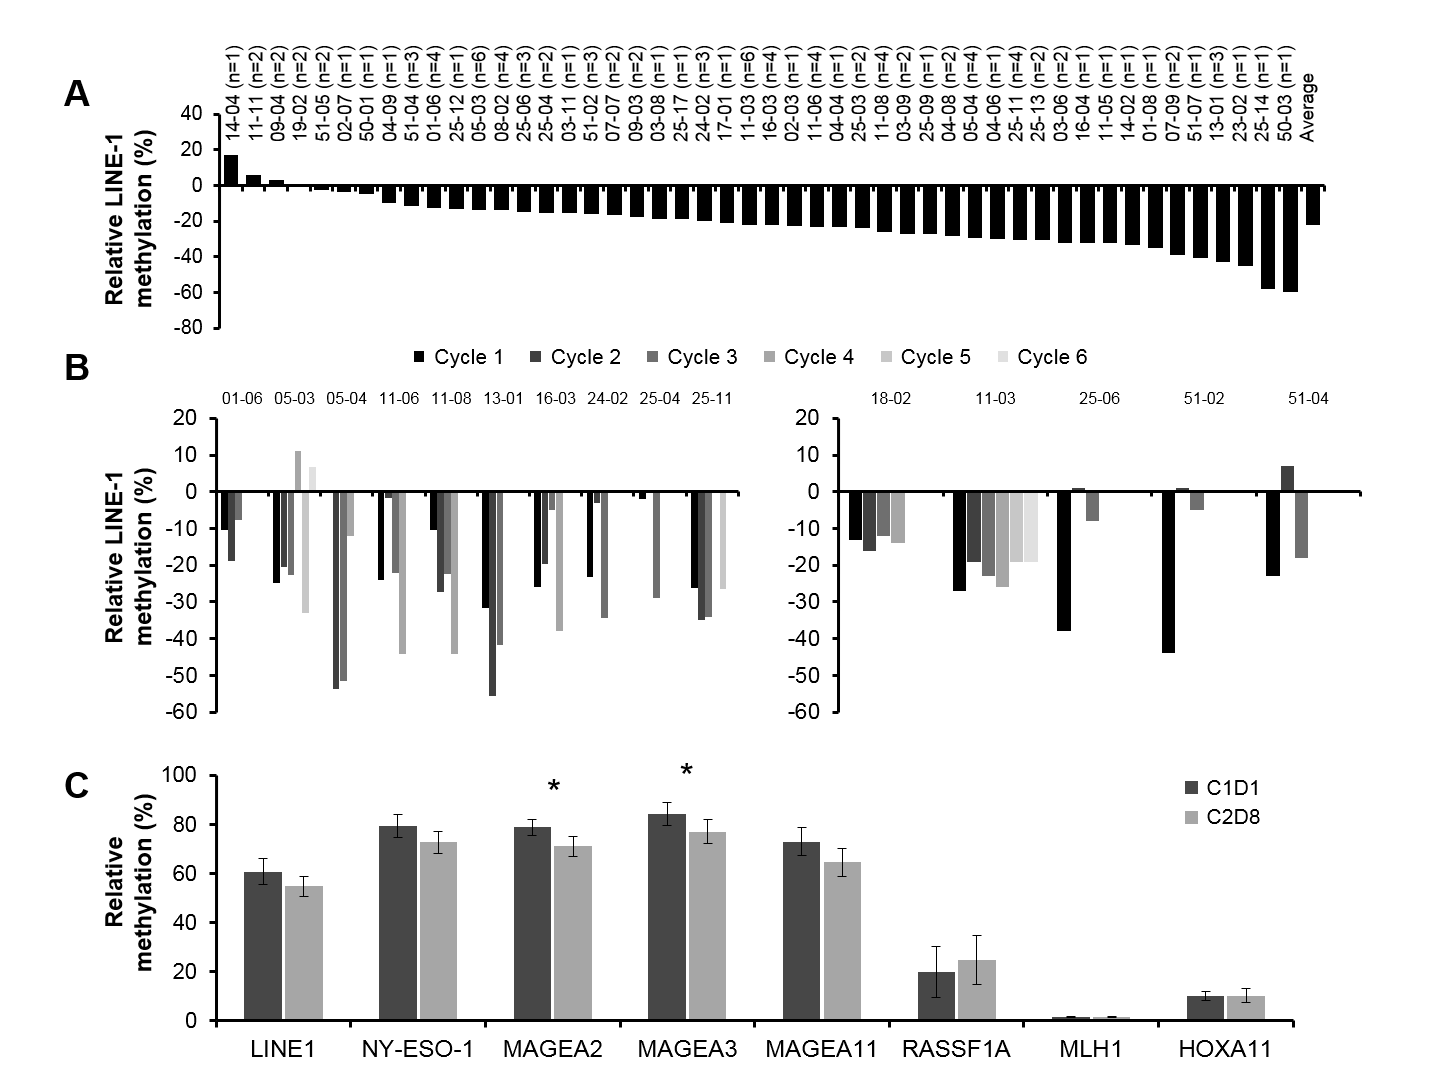


Supplementary Table S1. Genes tested for promoter methylation in tumor biopsies

| Genes for methylation analysis |
| --- |
|  |
| MAGEA2 |
| MAGEA3 |
| MAGEA11 |
| RASSF1A |
| NY-ESO-1 |
| MLH1 |
| BRCA1 |
| HOXA11 |

**Supplementary Table S2. Summary of CA-125 reduction#**

|  | **G+C**a  **(n=51)** | | **TC**  **(n=49)** | | **Crossover**  **TC to G+C**a  **(n=27)** | |
| --- | --- | --- | --- | --- | --- | --- |
| **Patients with Best Post-baseline CA-125 Percent  Reduction ≥ 50%** |  |  |  |  |  |  |
| n (%) | 15 | (36)b | 13 | (32)b | 6 | (29)b |
| (95% CI) | (21.6, 52.0) | | (18.1, 48.1) | | (11.3, 52.2) | |
|  |  |  |  |  |  |  |
| **Best (Most Reduced) Percent Change From Baseline** |  | |  | |  | |
| n | 42 | | 41 | | 21 | |
| Mean | -25.02 | | -5.06 | | -22.45 | |
| SD | 63.58 | | 74.63 | | 40.18 | |
| SE | 9.81 | | 11.66 | | 8.77 | |
| Median | -43.16 | | -10.15 | | -32.16 | |
| Min | -97.6 | | -98.3 | | -97.3 | |
| Max | 153.8 | | 247.8 | | 53.0 | |
| # Assessed in all patients who had a CA125 > 70 or 2XULN (includes both patients with detectable and measurable disease)  aGuadecitabine 30 mg/m2 on Days 1-5 and carboplatin AUC 4 on Day 8 of 28-day treatment cycles.  bPercentages are based on a denominator of 42, 41, and 21 subjects in the G+C, TC, and TC crossover groups, respectively who had a CA125 > 70 or 2X ULN. | | | | | | |

**Supplementary Table S3: Patient disposition and reason for subject discontinuation of trial treatment**

| **Patient Disposition** | **G+C**a  **(n=51)** | | **TC**  **(n=49)** | | **Crossover**  **TC to G+C**a  **(n=27)** | |
| --- | --- | --- | --- | --- | --- | --- |
| Patients Enrolled/Randomized/Treatedb | 51 |  | 49 |  | 27 |  |
| Patients treated (Safety data set) | 51 | (100) | 49 | (100) | 27 | (100) |
| Efficacy analysis data set | 51 | (100) | 49 | (100) | 27 | (100) |
| Reason for treatment discontinuation |  |  |  |  |  |  |
| Disease progression | 41 | (80) | 39 | (80) | 21 | (78) |
| AE | 3 | (6) | 3 | (6) | 2 | (7) |
| Patient decision | 2 | (4) | 2 | (4) | 0 |  |
| Investigator discretion | 3 | (6) | 2 | (4) | 2 | (7) |
| Other | 2 | (4) | 3 | (6) | 2 | (7) |
| Trial discontinuation |  |  |  |  |  |  |
| Withdrawal of consent | 1 | (2) | 2 | (4) | 0 |  |
| Death | 43 | (84) | 18 | (37) | 22 | (81) |
| Lost to follow-up | 0 |  | 0 |  | 1 | (4) |
| Database lock | 7 | (14) | 2 | (4) | 4 | (15) |
| aGuadecitabine 30 mg/m2 on Days 1-5 and carboplatin AUC 4 on Day 8 of 28-day treatment cycles.  bThree subjects (07-06 randomized to G+C, and 05-05 and 11-01 randomized to TC) were enrolled but not treated and are not included in the table. | | | | | | |
